# Supplementary material for: Pharmacophore-driven identification of human glutaminyl cyclase inhibitors from foods, plants and herbs unveils the bioactive property and potential of Azaleatin in the treatment of Alzheimer's disease
Source: Royal Society of Chemistry journal article supplement (doi:10.1039/d2fo02507h), 2022-01-01
Supplement: d2fo02507h1.pdf [file d2fo02507h1.pdf]

# **Pharmacophore-driven Identification of Human Glutaminyl Cyclase Inhibitors from Foods, Plants and Herbs Unveil the Bioactive Property and Potential of Azaleatin for the Treatment of Alzheimer's Disease**

**Keng-Chang Tsai<sup>a,b\*</sup>, Yi-Xuan Zhang<sup>c</sup>, Hsiang-Yun Kao<sup>c</sup>, Kit-Man Fung<sup>c,d</sup> and Tien-Sheng Tseng<sup>c\*</sup>**

<sup>a</sup> National Research Institute of Chinese Medicine, Ministry of Health and Welfare, Taipei, Taiwan.

<sup>b</sup> Ph.D. Program in Medical Biotechnology, College of Medical Science and Technology, Taipei Medical University, Taipei, Taiwan.

<sup>c</sup> Institute of Molecular Biology, National Chung Hsing University, Taichung, Taiwan

<sup>d</sup> Institute of Biological Chemistry, Academia Sinica, Taipei 115, Taiwan.

\* Correspondence:

Dr. Tien-Sheng Tseng

Email: [emersontseng@dragon.nchu.edu.tw](mailto:emersontseng@dragon.nchu.edu.tw)

Dr. Keng-Chang Tsai

Email: [tkc@nricm.edu.tw](mailto:tkc@nricm.edu.tw)

# Supporting information

## Figures

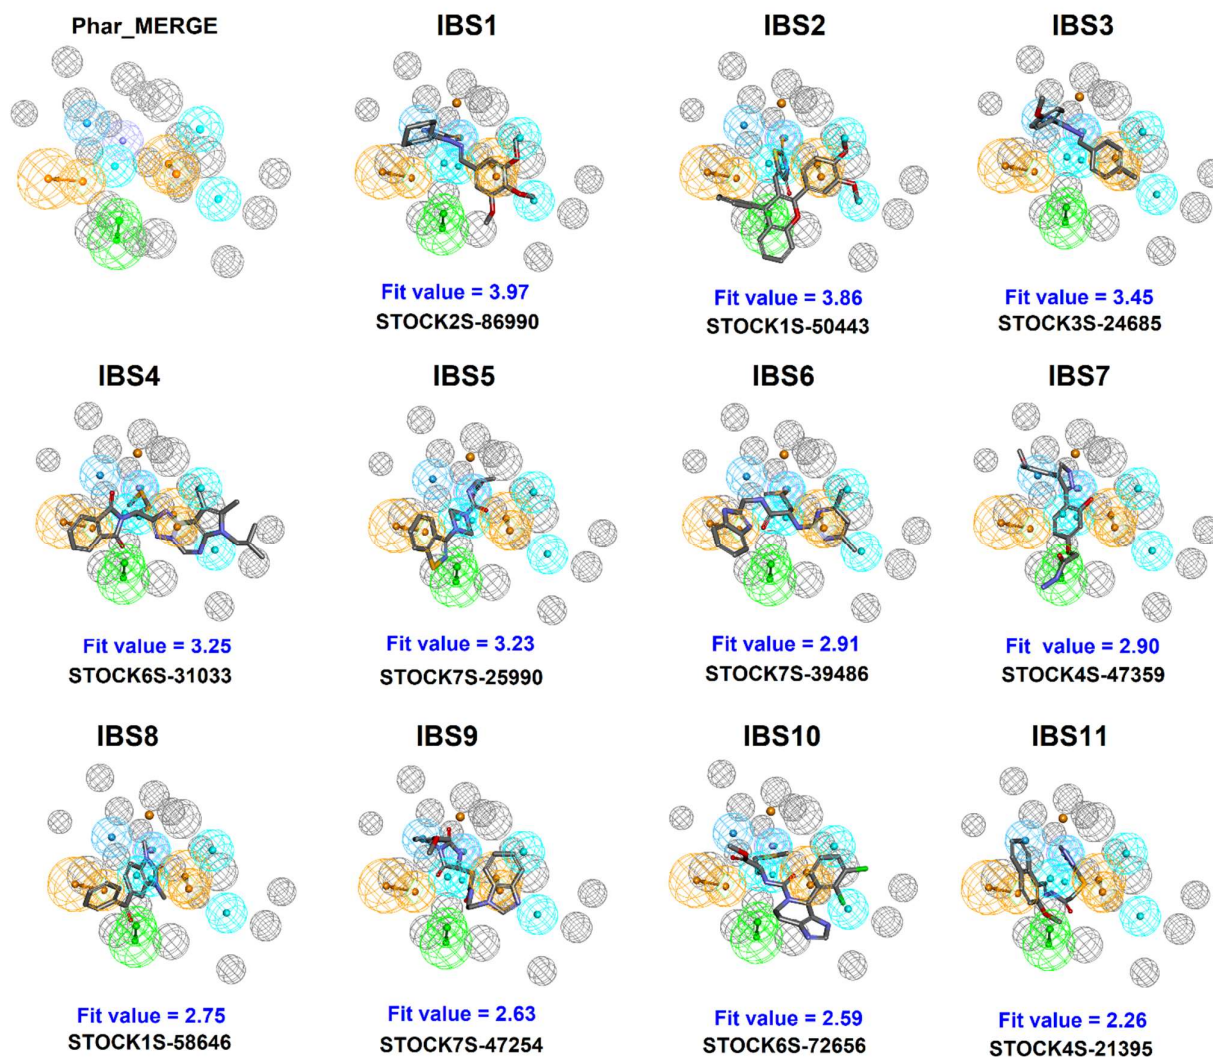

**Figure S1.** The results of ligand-pharmacophore (Phar-MERGE) mapping of TOP 11 hits screened from Natural Product database. The top 11 candidates identified from IBS database are mapped with pharmacophore model, Phar-MERGE. The fitting values and the compound named by IBS database are shown. (Pharmacophore features are color-coded as follows: cyan, hydrophobic; green, hydrogen-bond acceptor; orange, ring aromatic; purple, zinc ion binder and dark gray, excluded volume.)

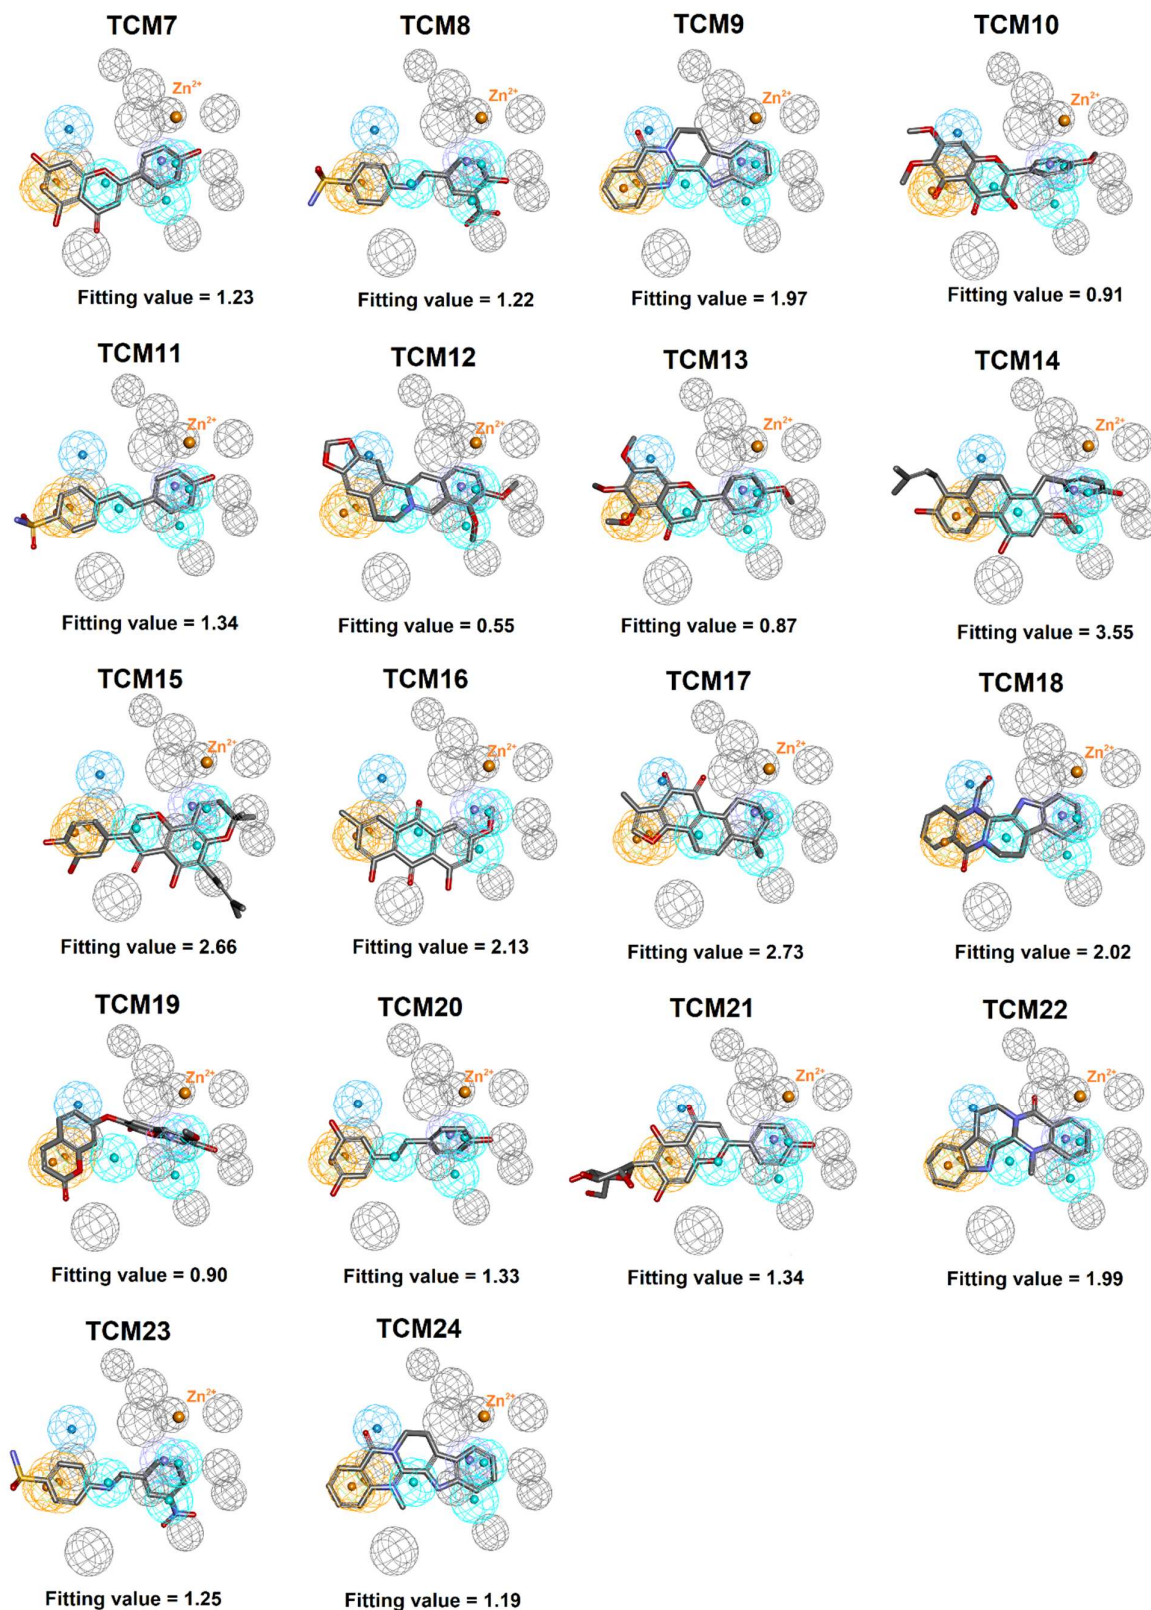

**Figure S2. The results of ligand-pharmacophore (Phar-SEN) mapping of hits screened from Traditional Chinese Medicine database.** The chemical structures of identified 18 candidates (TCM7~TCM24) mapped with **Phar-SEN**. (Pharmacophore features are color-coded as follows: cyan, hydrophobic; green, hydrogen-bond acceptor; orange, ring aromatic; purple, zinc ion binder and dark gray, excluded volume.)

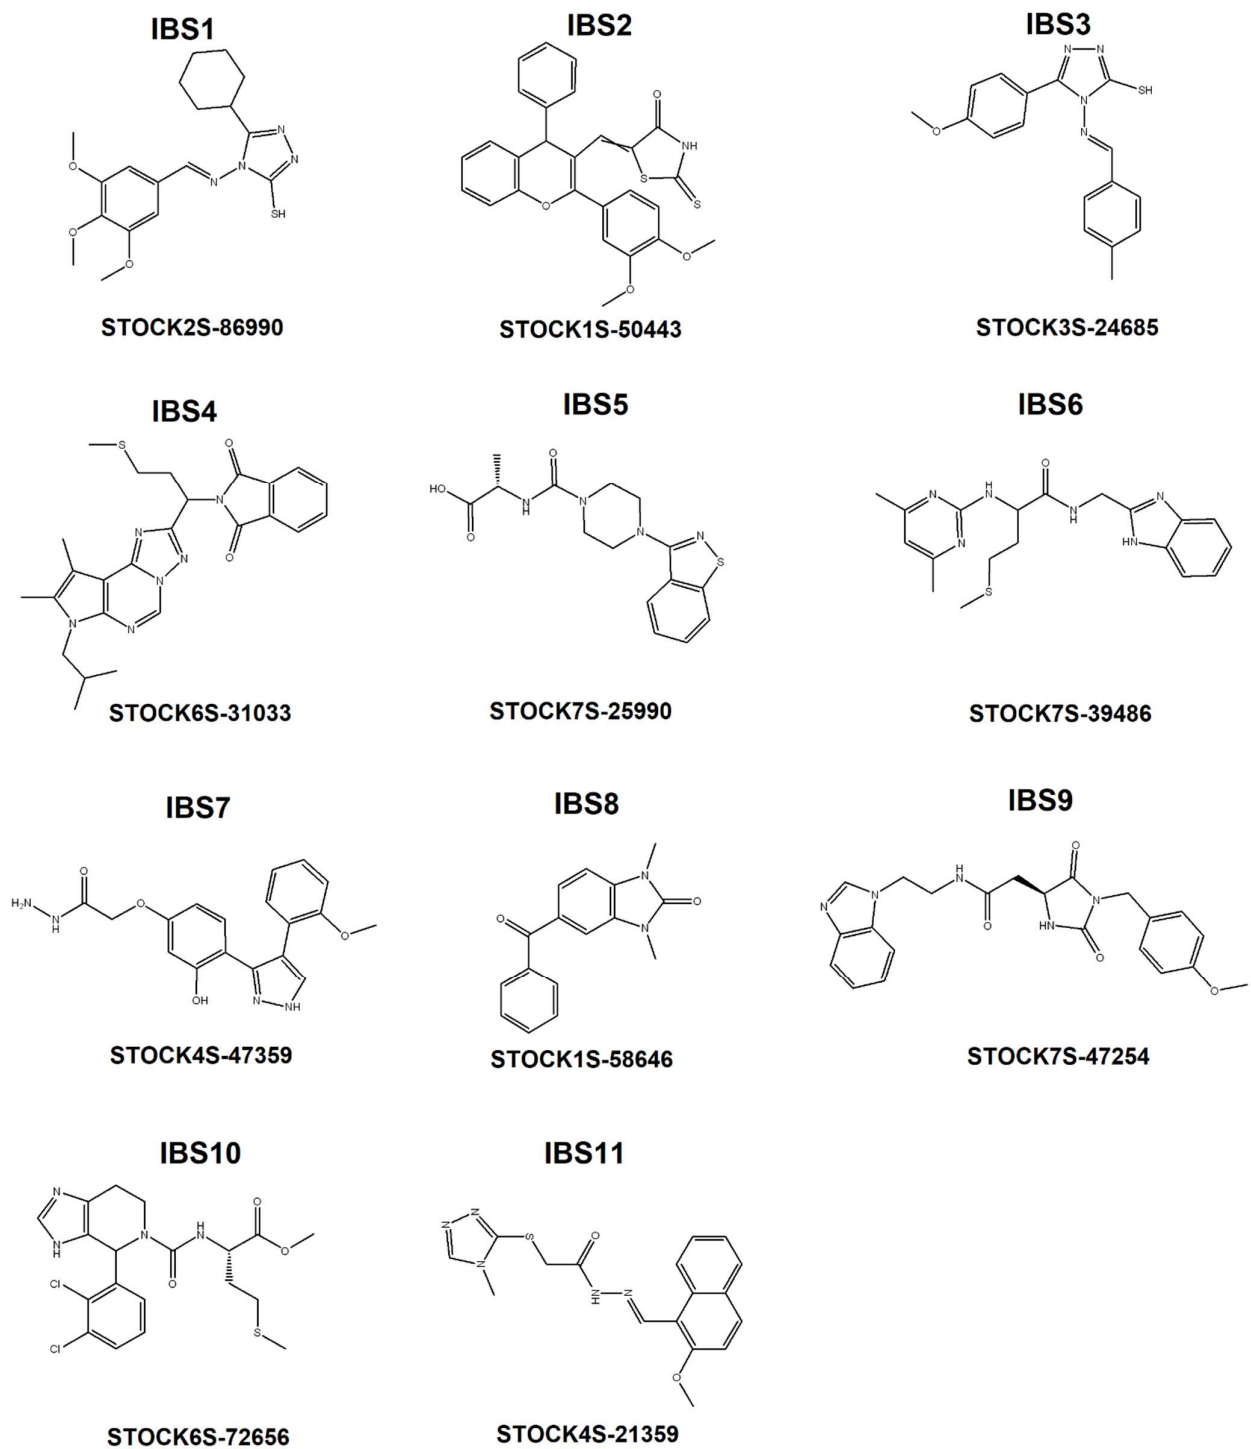

**Figure S3. The detailed chemical structures of hits screened by Phar-MERGE from IBS database.**

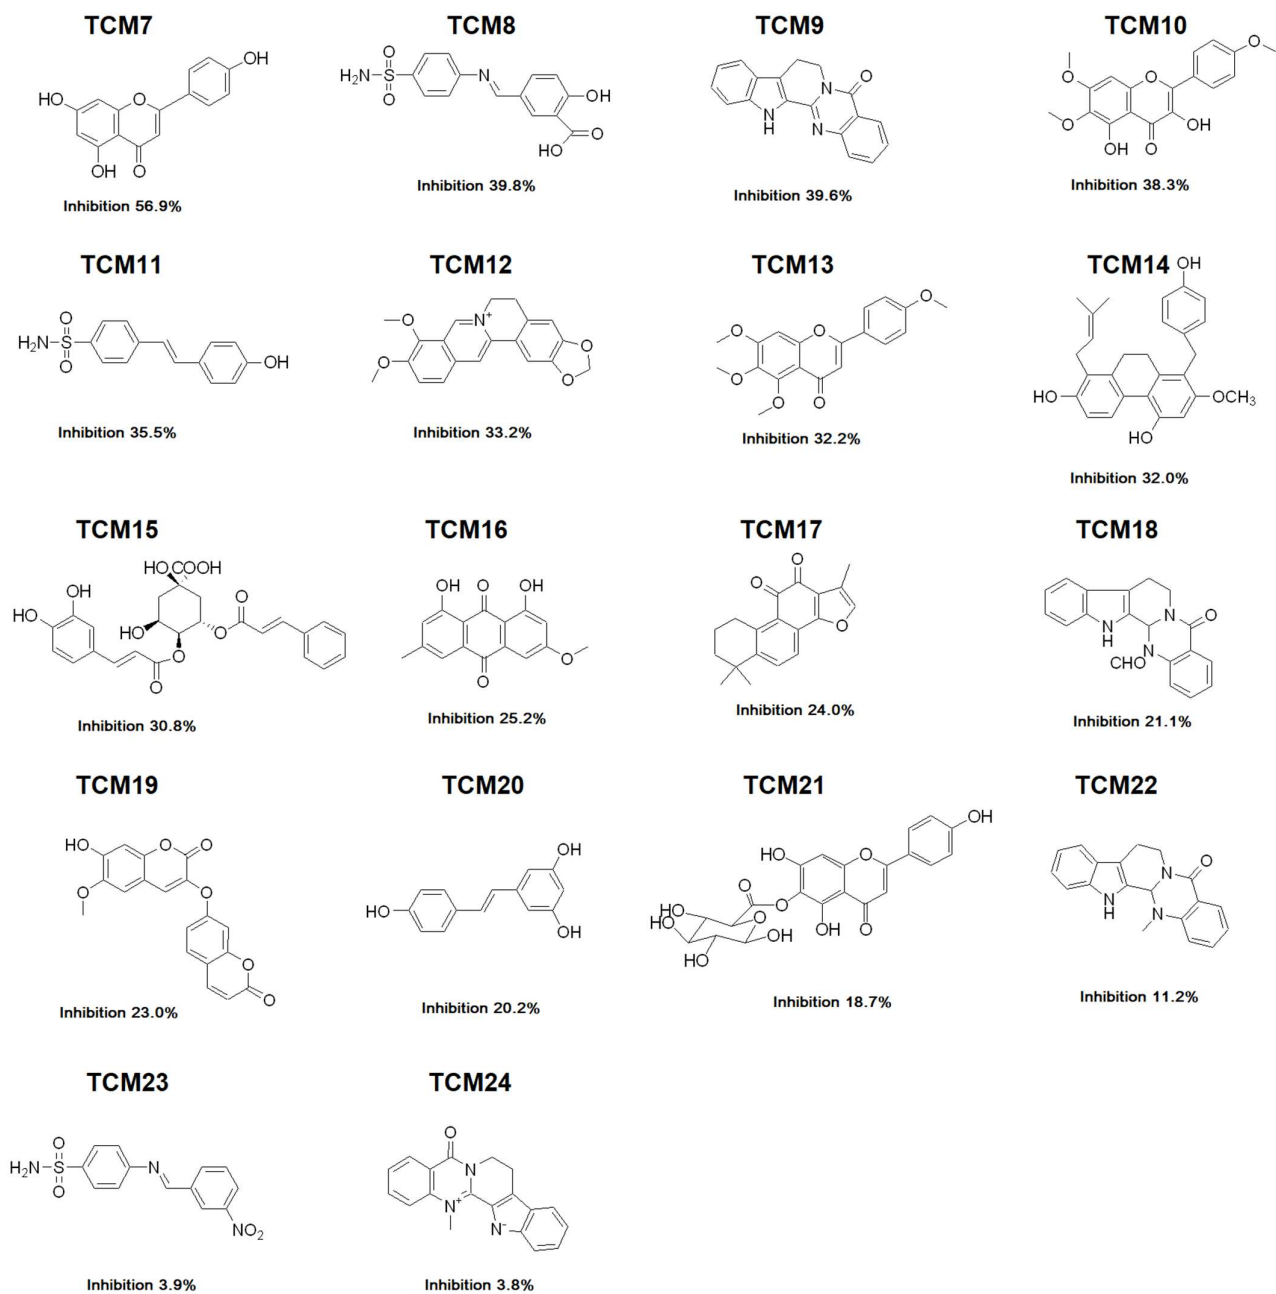

**Figure S4.** The detailed chemical structures of hits screened by Phar-SEN from TCM database. The 2D chemical structures and inhibition % (at 100  $\mu$ M) of TCM7~TCM24 against hQC are shown.

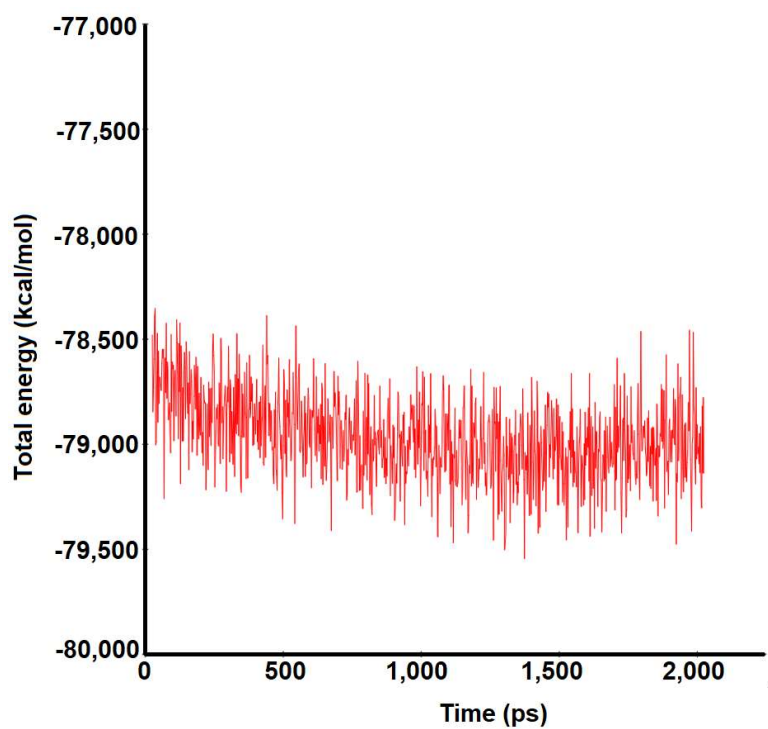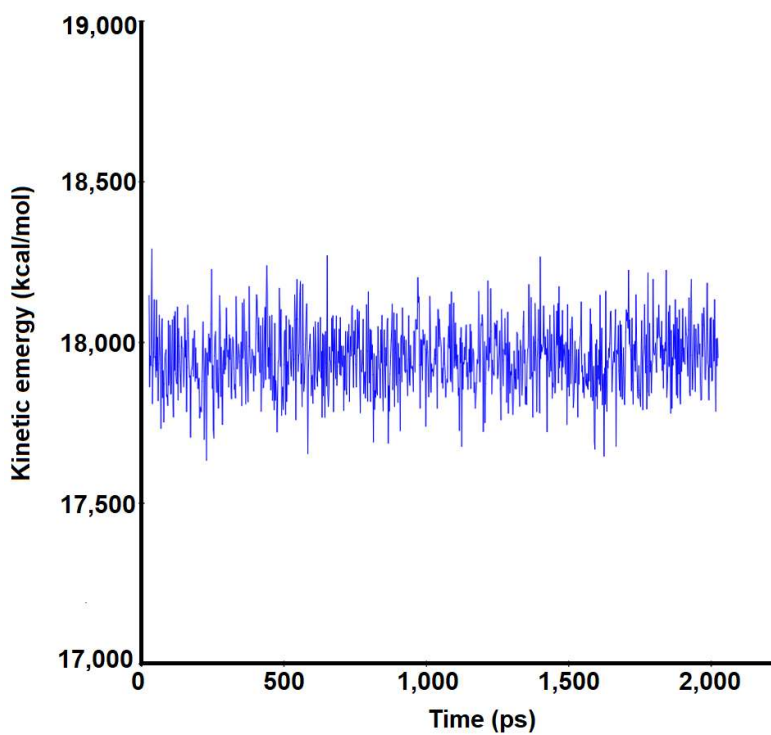

**Figure S5. The molecular dynamics simulations of hQC-TCM1.** The trajectory profiles of total energy and kinetic energy of hQC in complex with TCM1 during MD simulation time for 2,000 ps are presented.

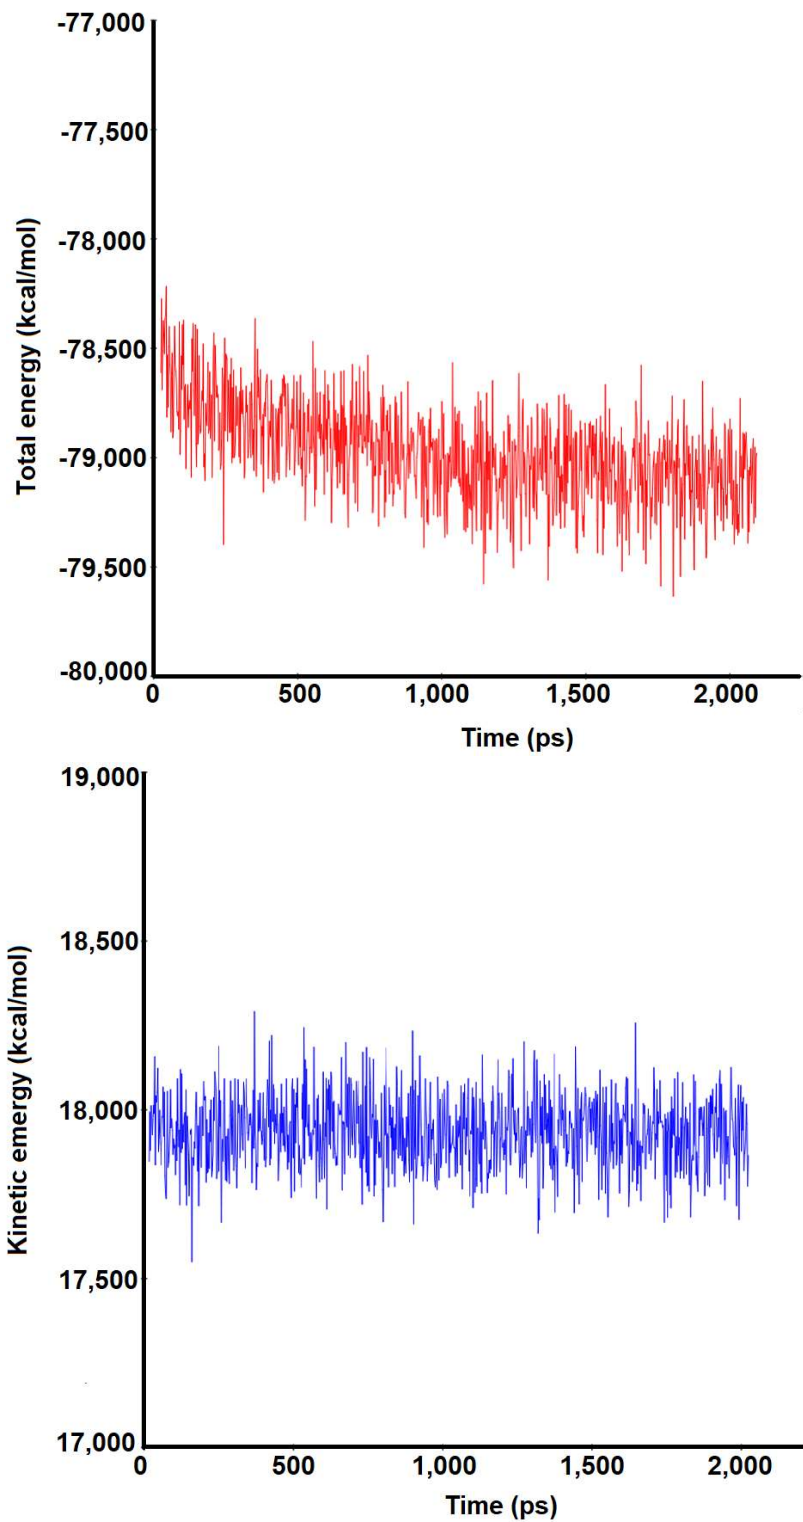

**Figure S6.** The molecular dynamics simulations of hQC-TCM2 complex. The total energy and kinetic energy as a function of simulation time for 2,000 ps are shown.

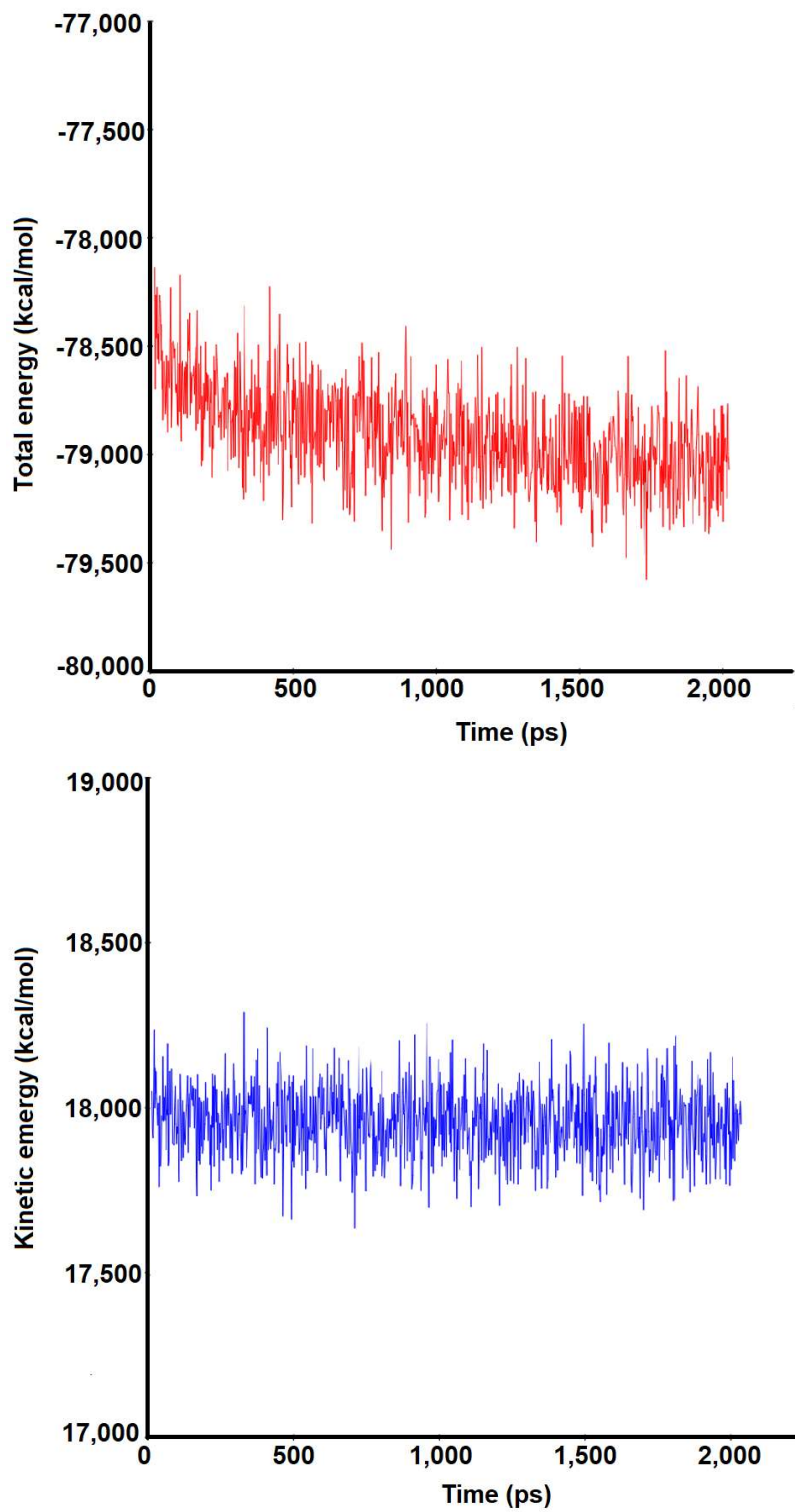

**Figure S7. The molecular dynamics simulations of hQC-TCM3.** The trajectory profiles of total energy and kinetic energy of hQC in complex with TCM3 during MD simulation time for 2,000 ps are presented.



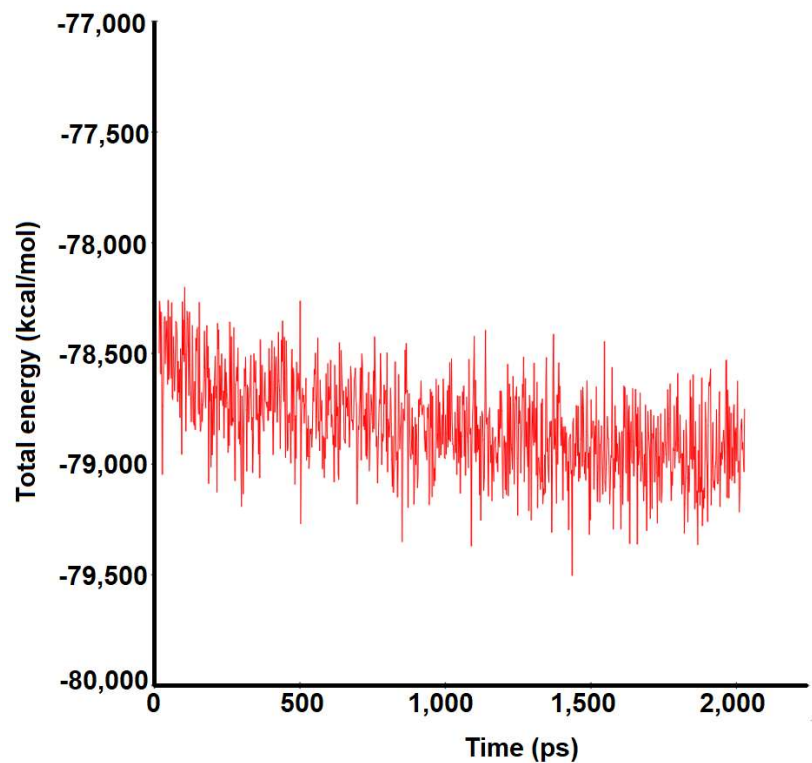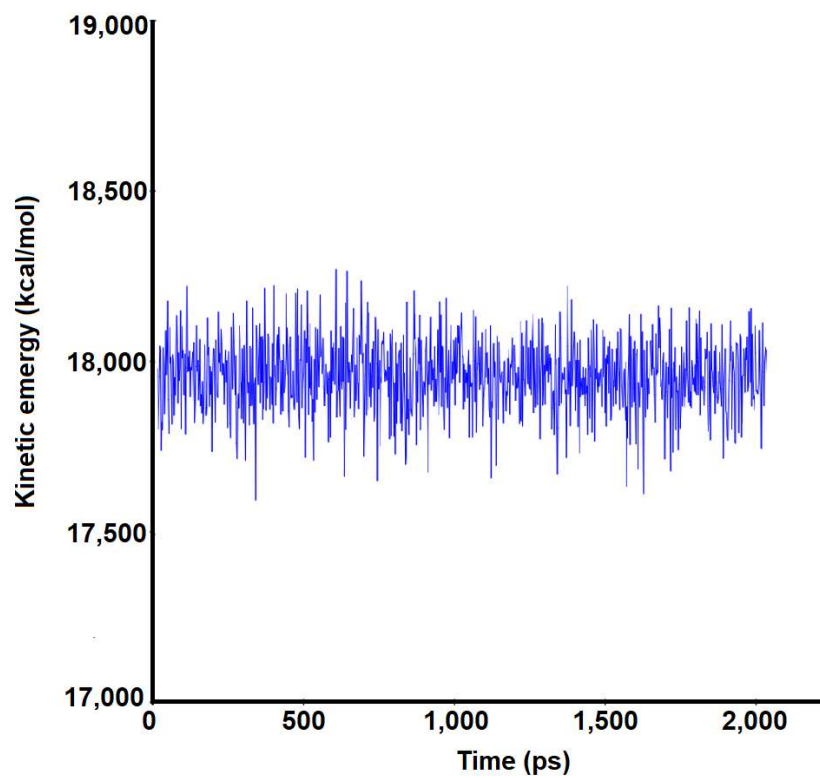

**Figure S8.** The molecular dynamics simulations of hQC-TCM4 complex. The total energy and kinetic energy as a function of simulation time for 2,000 ps are shown.

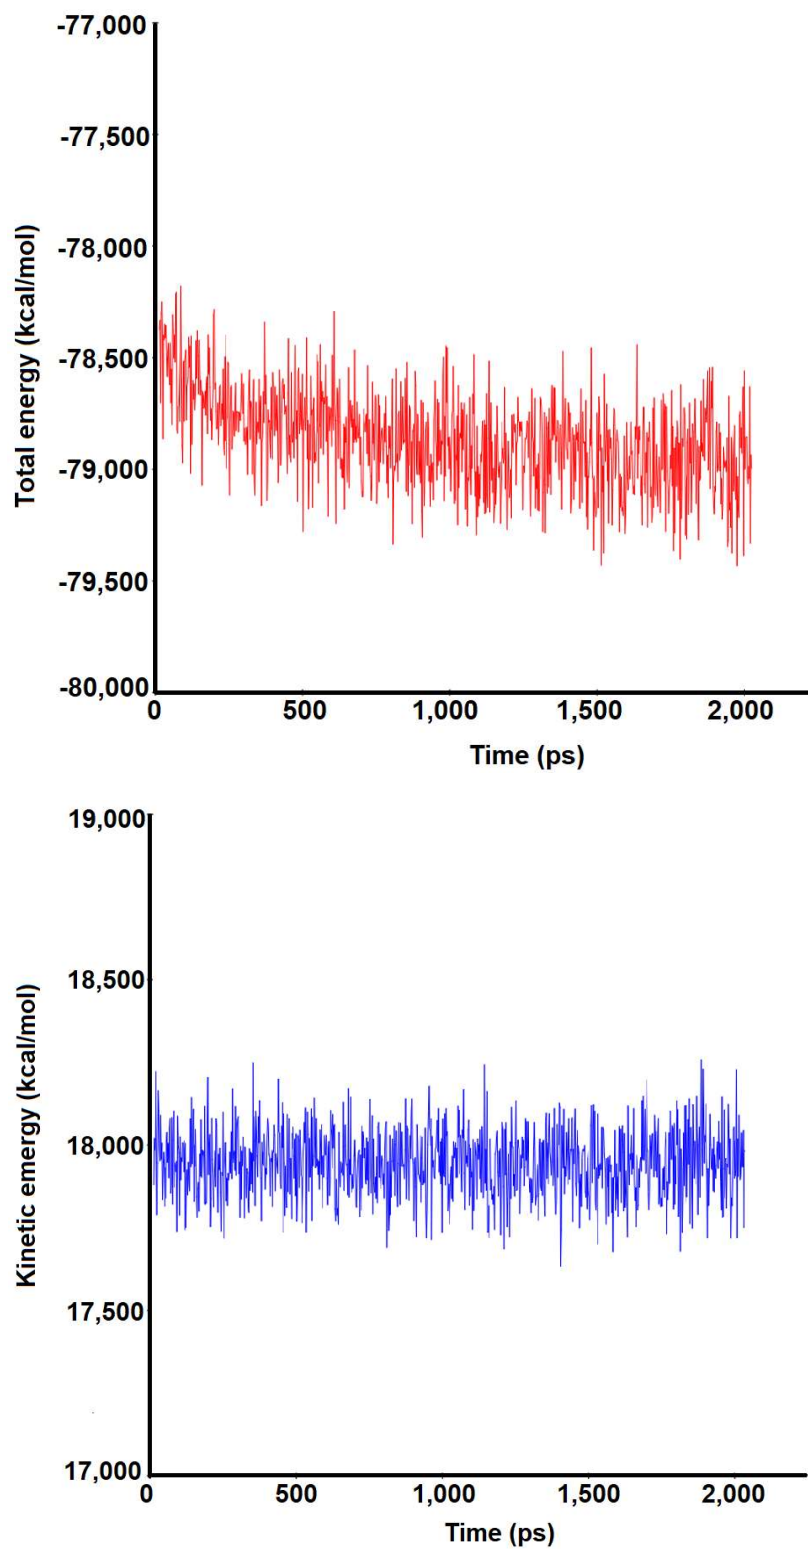

**Figure S9. The molecular dynamics simulations of hQC-TCM5.** The trajectory profiles of total energy and kinetic energy of hQC in complex with TCM5 during MD simulation time for 2,000 ps are presented.

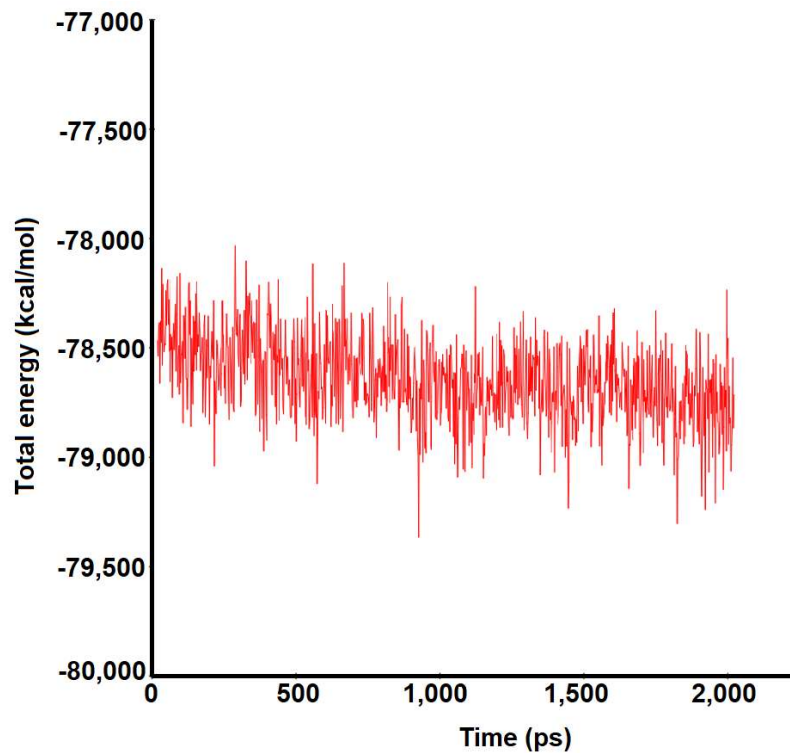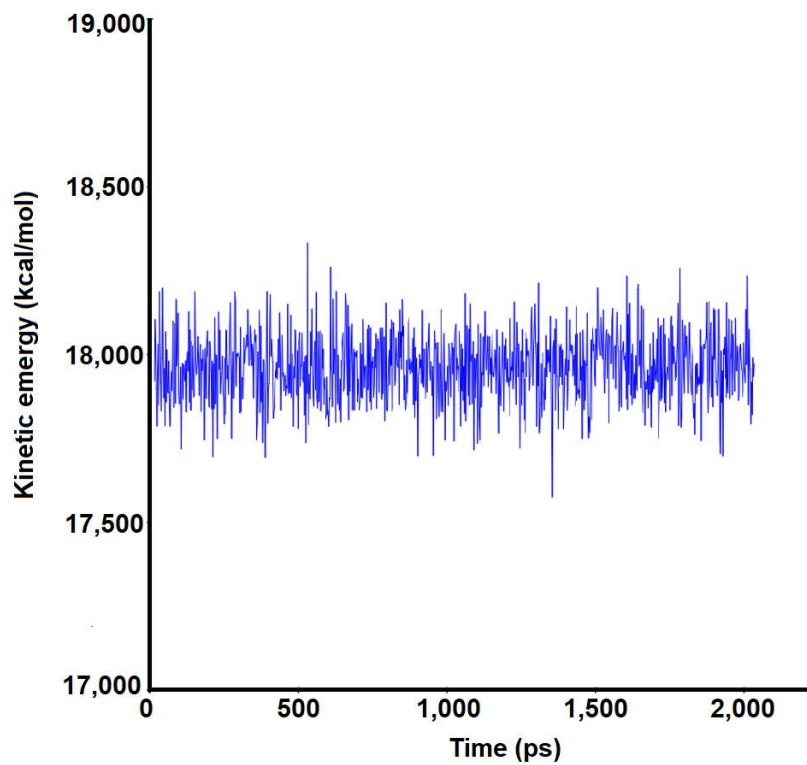

**Figure S10.** The molecular dynamics simulations of hQC-TCM6 complex. The total energy and kinetic energy as a function of simulation time for 2,000 ps are shown.

## IBS11

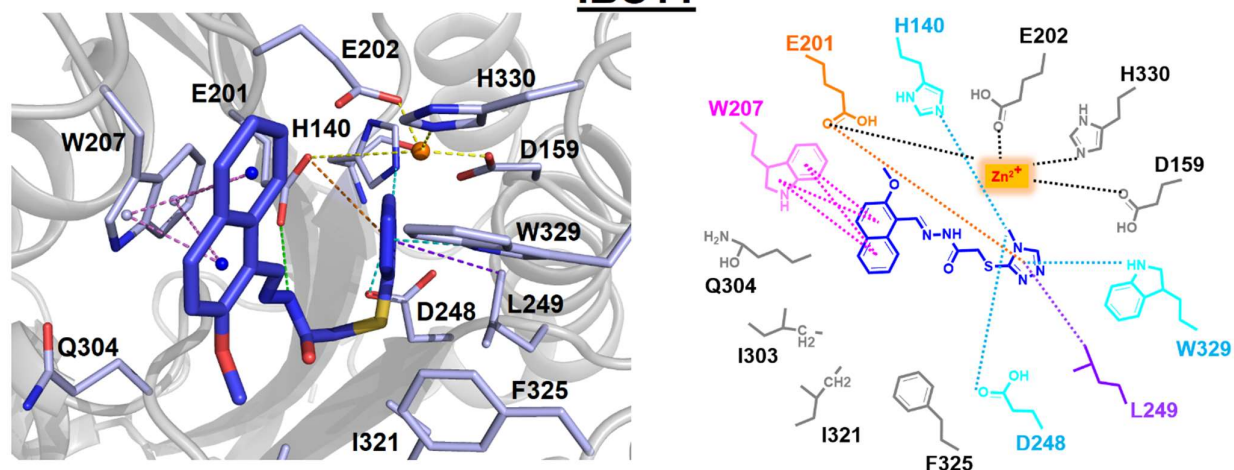

**Figure S11. The detailed molecular interactions of IBS11 targeting hQC.** The detailed molecular interactions of IBS11 binding to hQC was analyzed and shown. In the left panel, IBS11 is presented as stick (deep-blue); hQC is shown as ribbon (gray); zinc ion is displayed as spheres (orange). In the right panel, IBS11 is colored in deep-blue and the active site residues of hQC are labeled. The dash lines colored in magenta, orange, black, cyan, and purple denote the hydrophobic interaction, anion-pi interaction, and coordination with zinc ion, pi-donor hydrogen bond, and pi-sigma interaction, respectively.
